# Supplementary material
Source: PubMed Central journal article supplement (PMC4230210)
Supplement: jn.114.194472_nutrition194472SupplementaryData2.pdf [file jn.114.194472_nutrition194472SupplementaryData2.pdf]

**Online Supplemental Material**

**Supplemental Table 1.** Seven-day rotational menu consumed by pregnant, lactating, and control women for 10-12 weeks<sup>1,2</sup>

| Day (total amount of biotin for the day) | Breakfast                                                              | Lunch                                                                                                                          | Dinner                                                                                                                                            |
|------------------------------------------|------------------------------------------------------------------------|--------------------------------------------------------------------------------------------------------------------------------|---------------------------------------------------------------------------------------------------------------------------------------------------|
| Monday (Total: 56 µg)                    | 2 eggs, scrambled<br>2 slices toast<br>1 peach fruit cup<br>Juice      | Pesto sandwich:<br>2 slices bread<br>Pesto<br>Swiss Cheese<br>Romaine lettuce<br>Celery sticks<br>Carrot sticks                | Beef & cheese tacos:<br>3 corn tortillas<br>Ground beef<br>Cheddar Cheese<br>Iceberg lettuce<br>Melon<br>Milk                                     |
| Tuesday (Total: 90 µg)                   | Waffle<br>1 egg, hard-boiled<br>Juice                                  | Tuna sandwich:<br>2 slices bread<br>Tuna, canned<br>Cheddar cheese<br>Iceberg lettuce<br>Mayonnaise<br>Grapes                  | Spaghetti:<br>Cooked pasta<br>Tomato sauce<br>Mushrooms<br>Parmesan cheese<br>Mozzarella cheese<br>Milk                                           |
| Wednesday (Total: 32 µg)                 | Fitness crunch cereal<br>Milk<br>1 box of raisins<br>1 banana<br>Juice | Pastrami sandwich:<br>2 slices bread<br>Pastrami<br>Swiss cheese<br>Romaine lettuce<br>Cucumber                                | Vegetarian pizza:<br>Homemade dough<br>Tomato sauce<br>Red peppers, jarred<br>Mushrooms<br>Spinach<br>Mozzarella cheese<br>Apple sauce<br>Milk    |
| Thursday (Total: 101 µg)                 | 2 blueberry pancakes<br>Juice                                          | Egg salad sandwich:<br>2 slices bread<br>1 egg, hard-boiled<br>Mayonnaise<br>Romaine lettuce<br>Celery sticks<br>Carrot sticks | Beef & broccoli stir-fry:<br>Beef<br>Broccoli<br>Rice<br>Onions<br>Cantaloupe Melon<br>Milk                                                       |
| Friday (Total: 22 µg)                    | 1 bagel<br>1 orange fruit cup<br>Juice                                 | Bean burrito:<br>Black beans, canned<br>Cheddar cheese<br>Rice<br>1 large tortilla                                             | Lasagna:<br>Noodles<br>Tomato sauce<br>Ground beef<br>Cottage cheese<br>Mozzarella cheese<br>Parmesan cheese<br>Summer squash<br>Zucchini<br>Milk |

## Online Supplemental Material

|                         |                                                                              |                                                                                                 |                                                                                                                                                        |
|-------------------------|------------------------------------------------------------------------------|-------------------------------------------------------------------------------------------------|--------------------------------------------------------------------------------------------------------------------------------------------------------|
| Saturday (Total: 13 µg) | 2 raspberry muffins<br>1 banana<br>Juice                                     | Turkey sandwich:<br>2 slices bread<br>Turkey<br>Provolone cheese<br>Iceberg lettuce<br>Cucumber | Chicken quesadilla:<br>Chicken<br>2 large tortillas<br>Cheddar cheese<br>Corn, frozen<br>Milk                                                          |
| Sunday (Total: 84 µg)   | Oat granola cereal<br>Milk<br>1 box of raisins<br>1 peach fruit cup<br>Juice | Vegetable soup<br>Corn muffin<br>Grapes                                                         | Goulash:<br>Cooked pasta<br>Beef<br>Onions<br>Red peppers, jarred<br>Tomatoes, canned<br>Tomato puree<br>Potatoes, canned<br>Pineapple, canned<br>Milk |

---

<sup>1</sup>Juice choices included apple, cranberry-grape, or cranberry juice.

<sup>2</sup> Snacks were provided daily and contained 4µg biotin (which was added to the final biotin content for each day). The snacks included a yogurt (vanilla, raspberry, or peach flavored) and V8 juice (Campbell Soup Company)
